# Supplementary material
Source: publisher site journal article supplement (https://www.dovepress.com/get_supplementary_file.php?f=256868.docx)
Supplement: Supplementary file 1 [file get_supplementary_file.php]

**Supplement**

**Appendix 1 – Medications**

**Appendix 2 – Prior thyroid disorder**

**Appendix 3 – ICD-10 Diagnosis Codes**

**Table S1 – Normal TSH Group - Number of Admissions and Thyroid Function Tests**

**Table S2 – Abnormal TSH Group - Number of Admissions and Thyroid Function Tests**

**Appendix 1 – Medications**

1. Methimazole
2. Tapazole
3. Propylthiouracil
4. Levothyroxine
5. Synthroid
6. Levoxyl
7. Liothyronine
8. Cytomel

**Appendix 2 – Prior thyroid disorder**

1. Hypothyroidism
2. Hyperthyroidism
3. Subclinical hypothyroidism
4. Subclinical hyperthyroidism
5. Thyrotoxicosis
6. Grave’s Disease
7. Thyroiditis
8. Myxedema coma
9. Thyroid cancer
10. Goiter
11. Thyroid nodule

**Appendix 3 – ICD-10 Codes**

| E00 | Congenital iodine-deficiency syndrome |
| --- | --- |
| E00.0 | Congenital iodine-deficiency syndrome, neurological type |
| E00.1 | Congenital iodine-deficiency syndrome, myxedematous type |
| E00.2 | Congenital iodine-deficiency syndrome, mixed type |
| E00.9 | Congenital iodine-deficiency syndrome, unspecified |
|  |  |
| E01 | Iodine-deficiency related thyroid disorders and allied conditions |
| E01.0 | Iodine-deficiency related diffuse (endemic) goiter |
| E01.1 | Iodine-deficiency related multinodular (endemic) goiter |
| E01.2 | Iodine-deficiency related (endemic) goiter, unspecified |
| E01.8 | Other iodine-deficiency related thyroid disorders and allied conditions |
|  |  |
| E02 | Subclinical iodine-deficiency hypothyroidism |
|  |  |
| E03 | Other hypothyroidism |
| E03.0 | Congenital hypothyroidism with diffuse goiter |
| E03.1 | Congenital hypothyroidism without goiter |
| E03.2 | Hypothyroidism due to medicaments and other exogenous substances |
| E03.3 | Postinfectious hypothyroidism |
| E03.4 | Atrophy of thyroid (acquired) |
| E03.5 | Myxedema coma |
| E03.8 | Other specified hypothyroidism |
| E03.9 | Hypothyroidism, unspecified |
|  |  |
| E04 | Other nontoxic goiter |
| E04.0 | Nontoxic diffuse goiter |
| E04.1 | Nontoxic single thyroid nodule |
| E04.2 | Nontoxic multinodular goiter |
| E04.8 | Other specified nontoxic goiter |
| E04.9 | Nontoxic goiter, unspecified |
|  |  |
| E05 | Thyrotoxicosis [hyperthyroidism] |
| E05.0 | Thyrotoxicosis with diffuse goiter |
| E05.00 | Thyrotoxicosis with diffuse goiter without thyrotoxic crisis or storm |
| E05.01 | Thyrotoxicosis with diffuse goiter with thyrotoxic crisis or storm |
| E05.1 | Thyrotoxicosis with toxic single thyroid nodule |
| E05.10 | Thyrotoxicosis with toxic single thyroid nodule without thyrotoxic crisis or storm |
| E05.11 | Thyrotoxicosis with toxic single thyroid nodule with thyrotoxic crisis or storm |
| E05.2 | Thyrotoxicosis with toxic multinodular goiter |
| E05.20 | Thyrotoxicosis with toxic multinodular goiter without thyrotoxic crisis or storm |
| E05.21 | Thyrotoxicosis with toxic multinodular goiter with thyrotoxic crisis or storm |
| E05.3 | Thyrotoxicosis from ectopic thyroid tissue |
| E05.30 | Thyrotoxicosis from ectopic thyroid tissue without thyrotoxic crisis or storm |
| E05.31 | Thyrotoxicosis from ectopic thyroid tissue with thyrotoxic crisis or storm |
| E05.4 | Thyrotoxicosis factitia |
| E05.40 | Thyrotoxicosis factitia without thyrotoxic crisis or storm |
| E05.41 | Thyrotoxicosis factitial with thyrotoxic crisis or storm |
| E05.8 | Other thyrotoxicosis |
| E05.80 | Other thyrotoxicosis without thyrotoxic crisis or storm |
| E05.81 | Other thyrotoxicosis with thyrotoxic crisis or storm |
| E05.9 | Thyrotoxicosis, unspecified |
| E05.90 | Thyrotoxicosis, unspecified without thyrotoxic crisis or storm |
| E05.91 | Thyrotoxicosis, unspecified with thyrotoxic crisis or storm |
|  |  |
| E06 | Thyroiditis |
| E06.0 | Acute thyroiditis |
| E06.1 | Subacute thyroiditis |
| E06.2 | Chronic thyroiditis with transient thyrotoxicosis |
| E06.3 | Autoimmune thyroiditis |
| E06.4 | Drug-induced thyroiditis |
| E06.5 | Other chronic thyroiditis |
| E06.9 | Thyroiditis, unspecified |
|  |  |
| E07 | Other disorders of thyroid |
| E07.0 | Hypersecretion of calcitonin |
| E07.1 | Dyshormogenetic goiter |
| E07.8 | Other specified disorders of thyroid |
| E07.81 | Sick-euthyroid syndrome |
| E07.89 | Other specified disorders of thyroid |
| E07.9 | Disorder of thyroid, unspecified |
|  |  |
| E89.0 | Postprocedural hypothyroidism |
| O90.5 | Postpartum thyroiditis |
| R94.6 | Abnormal results of thyroid function studies |

**Table S1: Normal TSH Group - Number of Admissions & Thyroid Function Tests**

| ADMISSIONS | 4312 |
| --- | --- |
| TSH | 4617 |
| FT4 | 945 |
| FT3 | 16 |
| TT3 | 93 |

|  | DIAGNOSIS –  TREATMENT – | DIAGNOSIS +  TREATMENT – | DIAGNOSIS –  TREATMENT + | DIAGNOSIS +  TREATMENT + |
| --- | --- | --- | --- | --- |
| ADMISSIONS | 4260 | 49 | 0 | 3 |
| TSH | 4561 | 50 | 0 | 6 |
| FT4 | 926 | 12 | 0 | 7 |
| FT3 | 16 | 0 | 0 | 0 |
| TT3 | 92 | 1 | 0 | 0 |

TSH: Thyroid Stimulating Hormone; FT4: Free Thyroxine; FT3: Free Triiodothyronine; TT3: Total Triiodothyronine; +: present; -: absent

**Table S2: Abnormal TSH Group - Number of Admissions & Thyroid Function Tests**

| ADMISSIONS | 980 |
| --- | --- |
| TSH | 1124 |
| FT4 | 667 |
| FT3 | 30 |
| TT3 | 90 |

|  | DIAGNOSIS –  TREATMENT – | DIAGNOSIS +  TREATMENT – | DIAGNOSIS –  TREATMENT + | DIAGNOSIS +  TREATMENT + |
| --- | --- | --- | --- | --- |
| ADMISSIONS | 841 | 88 | 8 | 43 |
| TSH | 949 | 100 | 9 | 65 |
| FT4 | 522 | 84 | 7 | 54 |
| FT3 | 19 | 4 | 2 | 4 |
| TT3 | 69 | 11 | 1 | 9 |

TSH: Thyroid Stimulating Hormone; FT4: Free Thyroxine; FT3: Free Triiodothyronine; TT3: Total Triiodothyronine; +: present; -: absent
